# Supplementary material for: A Meta-analysis On Evidence Of Platelet-rich Plasma for Androgenetic Alopecia
Source: PubMed Central journal article supplement — Int J Trichology. 2018 Jan-Feb;10(1):1–10. doi: 10.4103/ijt.ijt_74_16 (PMC5803844; doi:10.4103/ijt.ijt_74_16), 2018
Supplement: IJT-10-1_Suppl1.pdf [file IJT-10-1_Suppl1.pdf]

---

**Supplemental Table 1: Supplemental digital content: Risk of bias assessments - Risk of bias of randomized controlled trials using Cochrane Collaboration's Risk of Bias Assessment tool**

---

| First Author                  | Sequence generation | Allocation Concealment | Blinding | Incomplete outcome data | Selective outcome reporting | Other sources of bias |
|-------------------------------|---------------------|------------------------|----------|-------------------------|-----------------------------|-----------------------|
| Takikawa 2011 <sup>[24]</sup> | Unclear             | Unclear                | Unclear  | High                    | Low                         | Unclear               |
| Lee 2015 <sup>[22]</sup>      | Unclear             | Unclear                | Unclear  | Low                     | Low                         | Low                   |
| Gentile 2015 <sup>[23]</sup>  | Low                 | Low                    | Low      | Low                     | Low                         | Low                   |
| Alves 2016 <sup>[24]</sup>    | Low                 | Low                    | Low      | Low                     | Low                         | Low                   |
| Mapar 2016 <sup>[25]</sup>    | Low                 | Low                    | Low      | Low                     | Low                         | Low                   |

---
