# Supplementary material for: A Meta-analysis On Evidence Of Platelet-rich Plasma for Androgenetic Alopecia
Source: PubMed Central journal article supplement — Int J Trichology. 2018 Jan-Feb;10(1):1–10. doi: 10.4103/ijt.ijt_74_16 (PMC5803844; doi:10.4103/ijt.ijt_74_16), 2018
Supplement: IJT-10-1_Suppl2.pdf [file IJT-10-1_Suppl2.pdf]

---

**Supplemental Table 2: Supplemental digital content: Risk of bias assessments - Risk of bias of nonrandomized controlled trials using Newcastle–Ottawa Scale**

| First author                  | Selection | Comparability | Outcome | Total |
|-------------------------------|-----------|---------------|---------|-------|
| Cervelli 2014 <sup>[20]</sup> | **        | ****          | ***     | 9     |
| Kang 2014 <sup>[21]</sup>     | **        | ****          | ***     | 9     |

\*Very high bias, \*\*High bias, \*\*\*Low bias, \*\*\*\*Very low bias
